# Supplementary material
Source: MDPI journal article supplement (https://www.mdpi.com/2571-6255/2/4/55)
Supplement: s1 [file s1]

Supplementary Information for “Land-Cover Dependent Relationships Between Fire and Soil Moisture” by Schaefer and Magi

Alexander J. Schaefer 1,2 and Brian I. Magi 2,*

1 Program in Infrastructure and Environmental Systems, The William States Lee College of Engineering, Charlotte, University of North Carolina at Charlotte, Charlotte, NC, 28223, USA; aschae11@uncc.edu

2 Department of Geography and Earth Sciences, University of North Carolina at Charlotte, Charlotte, NC, 28223, USA; brian.magi@uncc.edu

***** Correspondence: brian.magi@uncc.edu

Overview

Included in the Supplementary Information are a brief description of additional analysis and relevant references, tables, and figures.

Burned Area

To assess our results using burned area, as opposed to MODIS fire counts, we used the Global Fire Emissions Database version 4 or GFEDv4s [1]. GFED burned area is derived from satellite imagery for both large fires [2,3] and small fires [4], which are estimated based on the MODIS thermal anomalies product (MOD14A1) from the Terra satellite. They calculate the number of fires that lie outside the burned area of GFEDv4 [3] and use that information to incrementally increase the total burned area to include small fires, fires smaller than a 500 m MODIS pixel. The data are distributed on a quarter-degree grid for years 1997 through 2016, but as per the analysis in the main text, we only used 2000 through 2014 for consistency. GFEDv4s is widely used in the fire community, and while there are other burned area products available, GFEDv4s is derived from the combination of fire counts and burned area (MCD64A1) [5].

Supplementary Tables

**Table S1:** Top table shows normalization constants for Figures 3–4 of the main text and Figure S6, determined as the maximum bin-averaged FC for each LULC and each biome. The units are fire counts. The bottom table shows the corresponding normalization factors for the Figures S3, S8, and S9, in units of km2.

| **Normalization Factors** | **Global** | **Boreal** | **Grassland-Savanna** | **Temperate** | **Tropical** |
| --- | --- | --- | --- | --- | --- |
| Grass | 1.775 | 0.683 | 1.551 | 42.845 | 12.698 |
| Forest | 1.934 | 1.035 | 24.012 | 34.581 | 58.000 |
| Cropland | 1.803 | 1.337 | 2.192 | 10.980 | 40.304 |
| Pasture | 16.078 | 0.140 | 1.587 | 2.319 | 7.250 |

| **Normalization Factors** | **Global** | **Boreal** | **Grassland-Savanna** | **Temperate** | **Tropical** |
| --- | --- | --- | --- | --- | --- |
| Grass | 4.026 | 0.200 | 2.630 | 61.638 | 14.054 |
| Forest | 1.251 | 0.388 | 22.236 | 59.419 | 51.000 |
| Cropland | 3.018 | 8.455 | 1.487 | 1.383 | 54.724 |
| Pasture | 18.757 | 0.483 | 3.673 | 22.873 | 8.343 |

**Table S2:** The percentage of firecounts (FC) remaining as a function of LULC and biome after the 75% threshold is applied. In total (across biome and LULC), about 15% of FC remain in the analysis with the 75% threshold. The numbers in brackets show the percentage of FC remaining after a 50% threshold is applied.

| **After 75% Threshold:** | **FCs Remaining IN BORL BIOME (%)** | **FCs Remaining IN GRSA BIOME (%)** | **FCs Remaining IN TEMP BIOME (%)** | **FCs Remaining IN TROP BIOME (%)** | **Total FCs Remaining (%)** |
| --- | --- | --- | --- | --- | --- |
| GRASS | 57 (59) | 25 (43) | 22 (46) | 15 (48) | 25 (45) |
| FOREST | 85 (93) | 33 (64) | 40 (60) | 33 (63) | 43 (69) |
| CROPLAND | 1 (19) | 2 (8) | 1 (15) | 0.06 (2) | 1 (10) |
| PASTURE | 1 (3) | 18 (36) | 6 (20) | 8 (24) | 13 (28) |

Supplementary Figures





**Figure S1**: Average number of points that were used to make the monthly average soil moisture of Figure 1 of the main text.


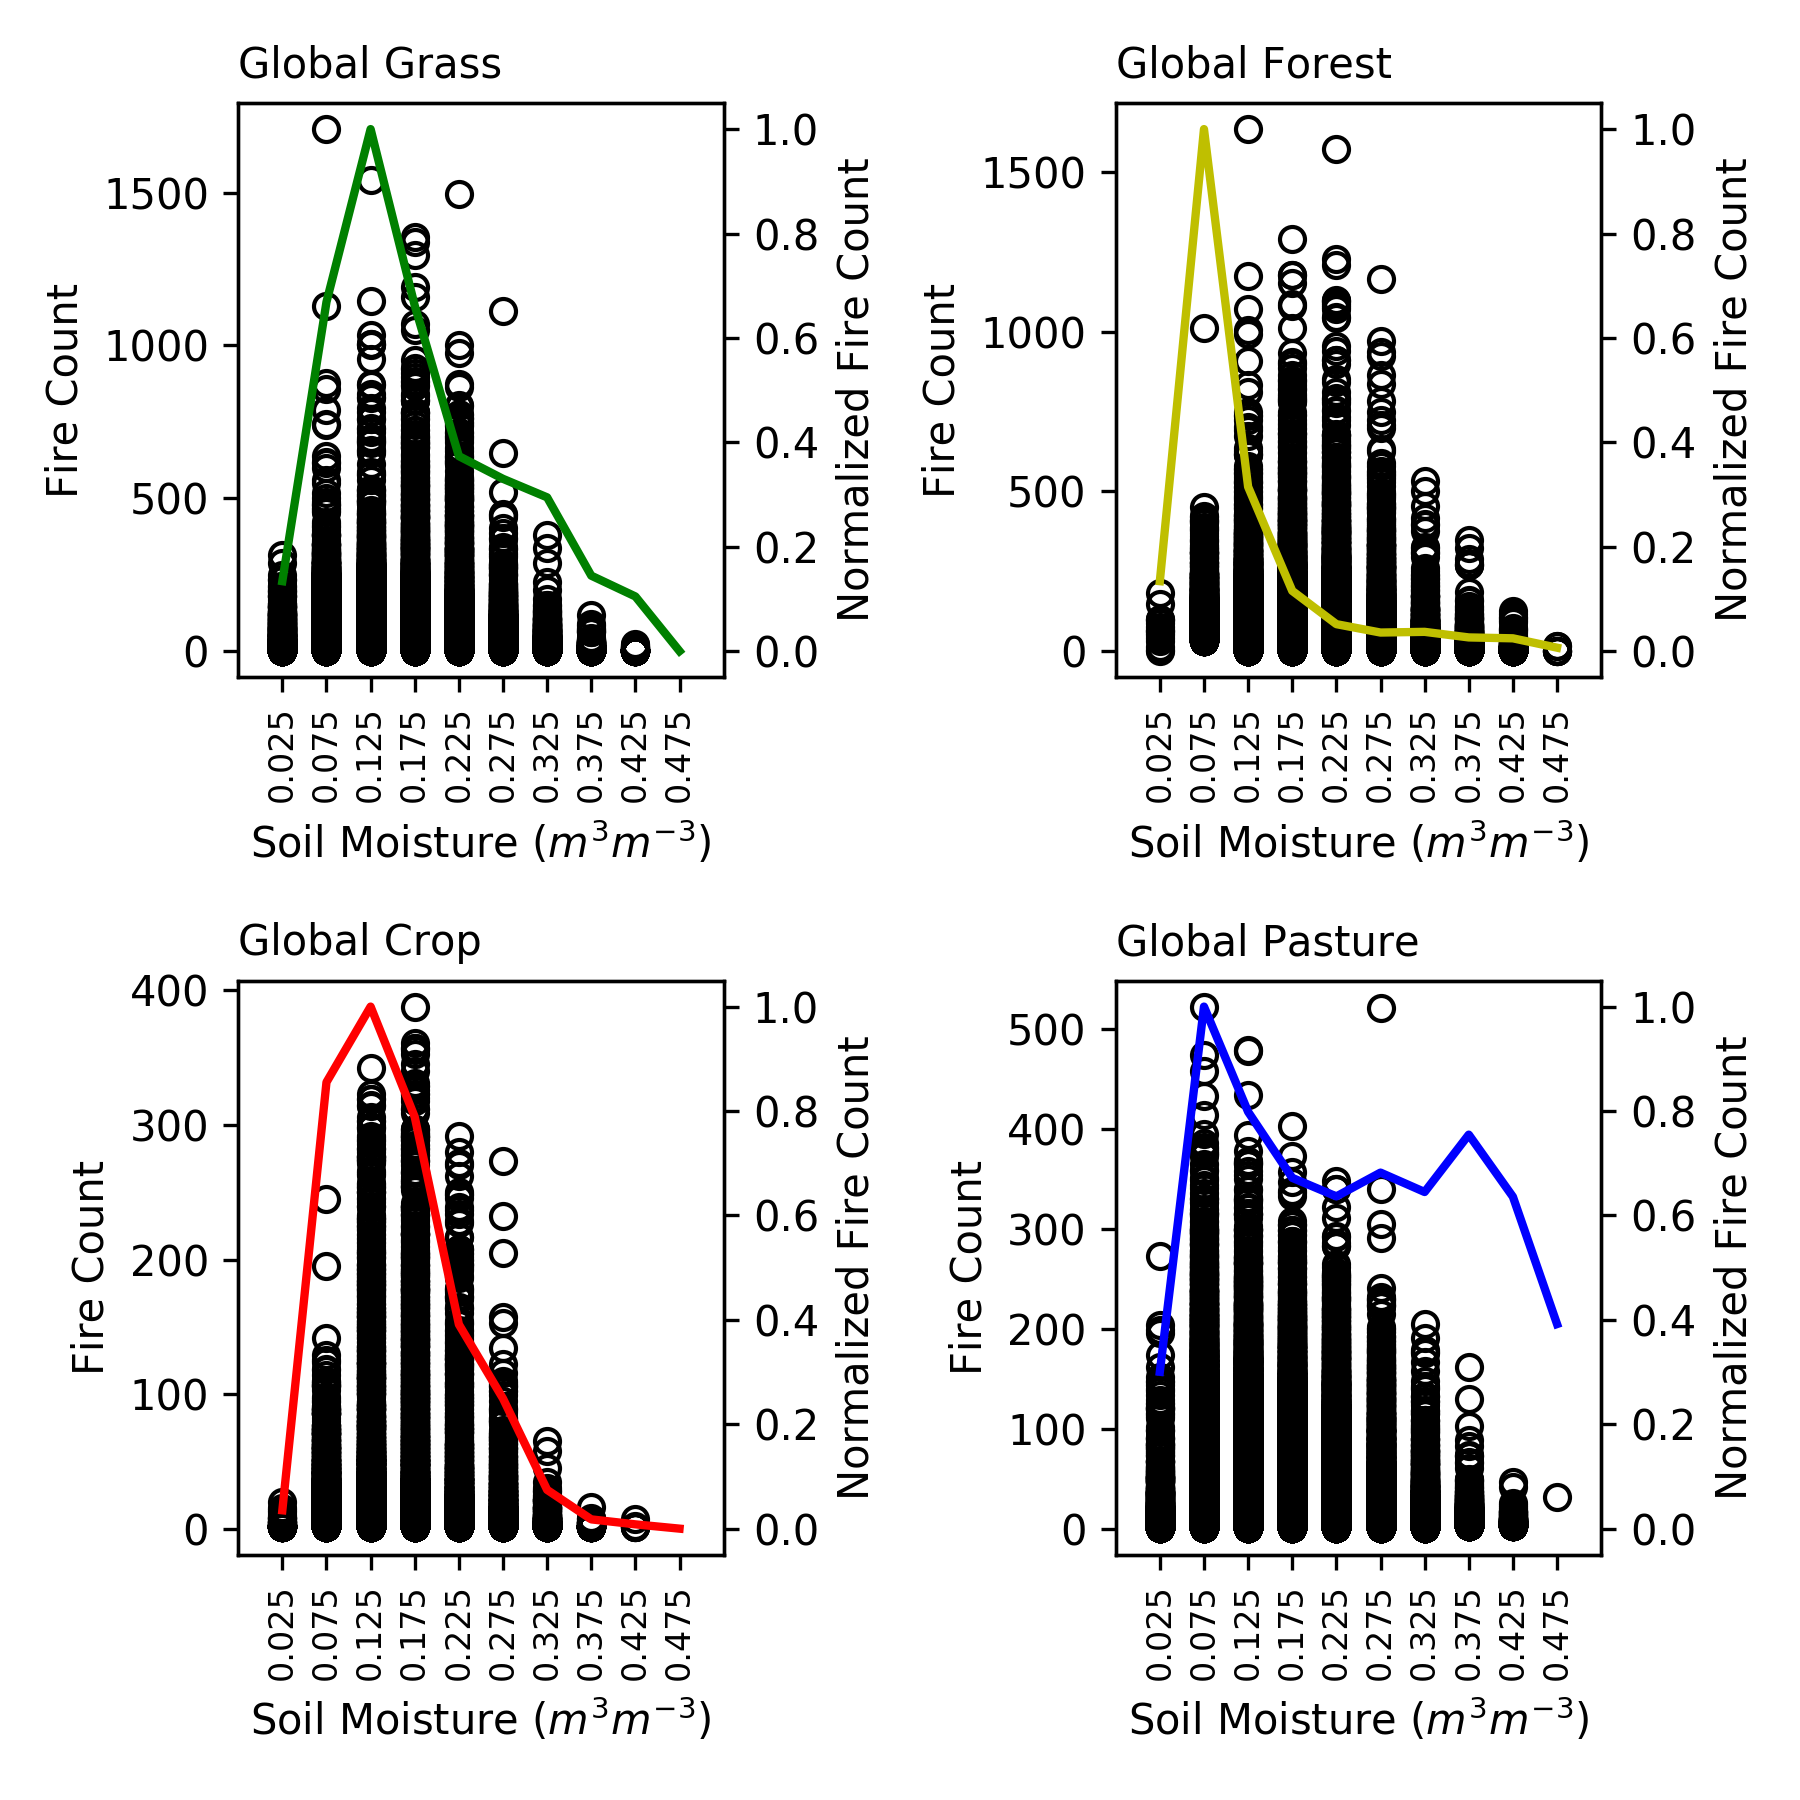


**Figure S2**: Variability of the fire counts in each bin of soil moisture (1st y-axis in raw fire counts ranging from zero to very high values), where the values on the second y-axis correspond to the colored lines in the figure and are also plotted in Figure 3 of the main text.


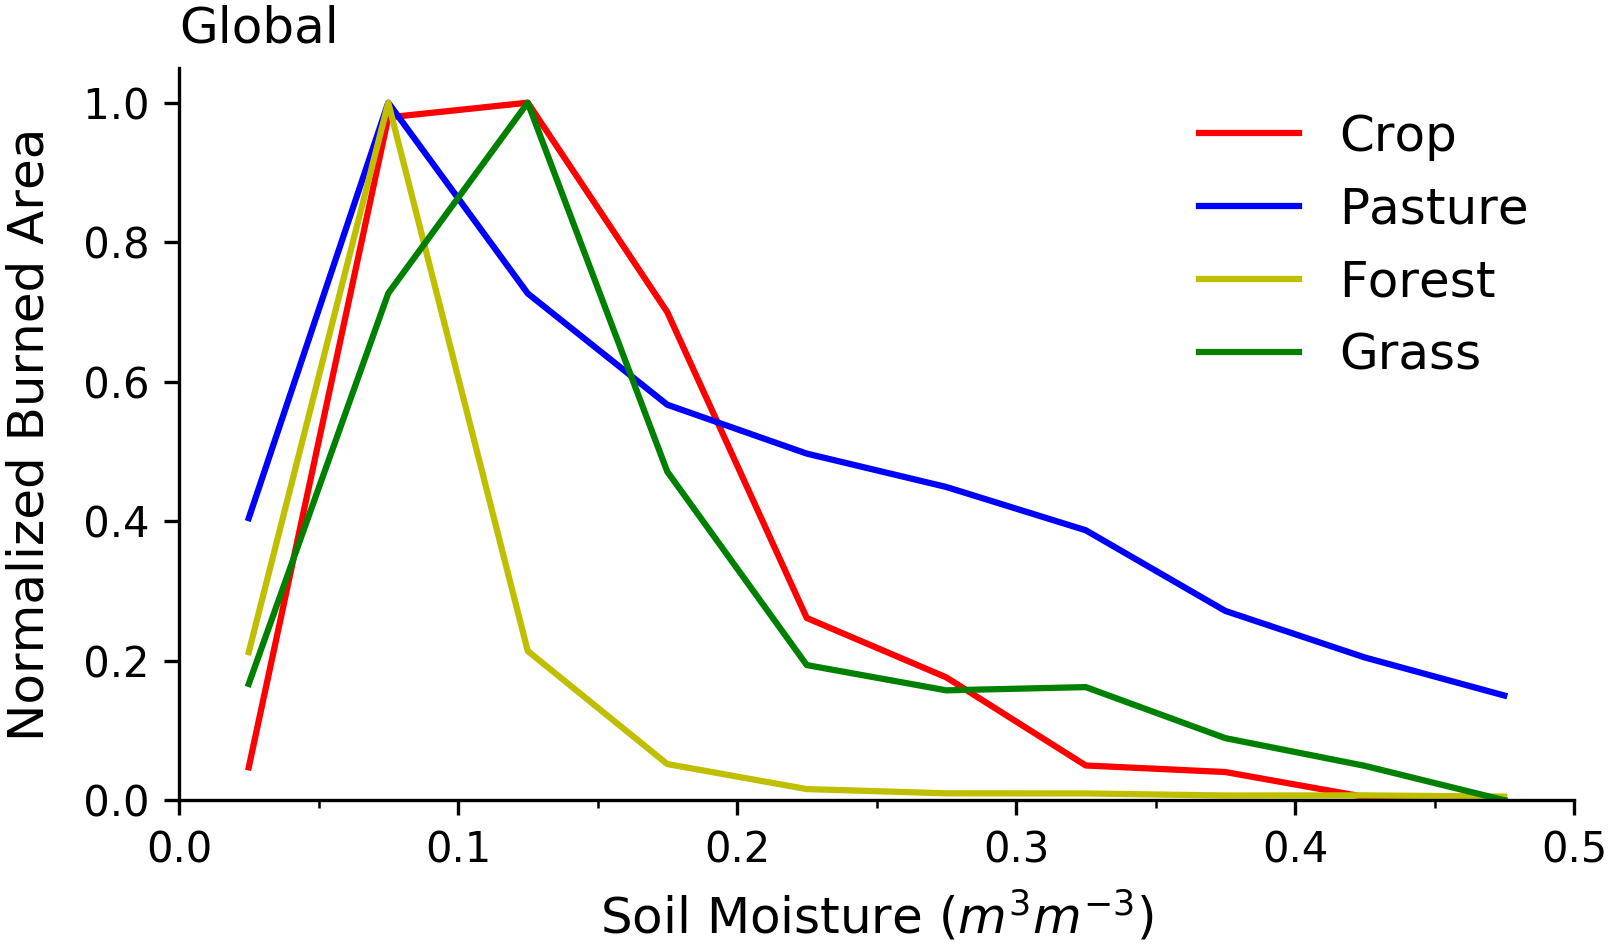


**Figure S3:** Relationships between burned area and soil moisture across different land-use and land cover types at the global scale.


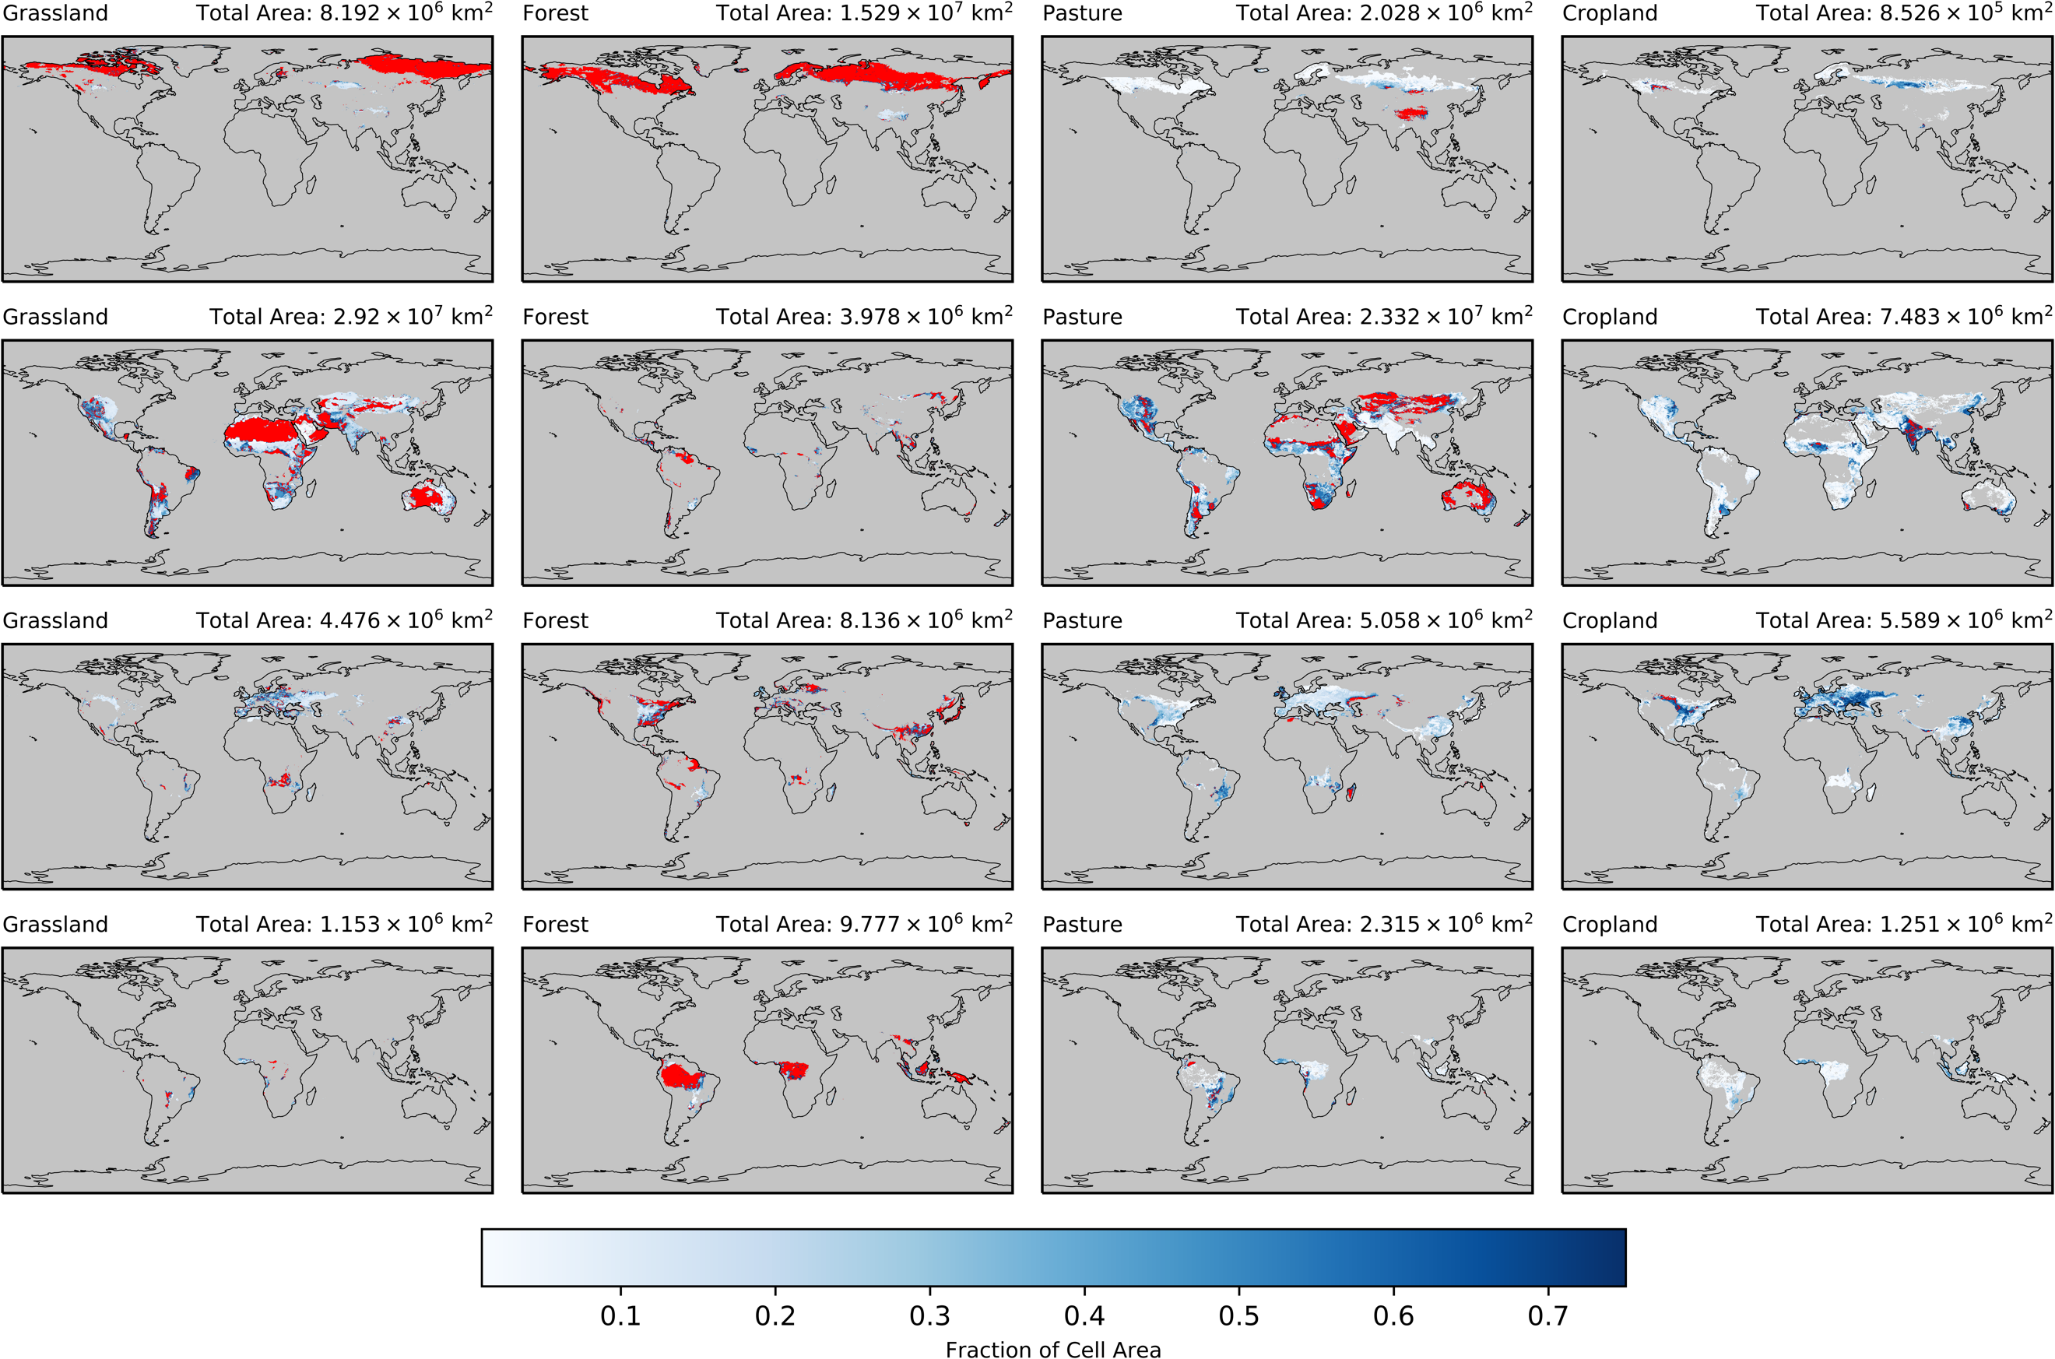


**Figure S4:** Fraction of gridcell for each LULC category (columns as Grassland, Forest, Pasture, and Cropland, as labeled) in each biome (rows, which are Boreal, Grassland-Savanna, Temperate, and Tropical biomes from top to bottom). Red indicates cells greater than the 75% threshold and grey denotes missing data. This expands on Figure 2 in the main text.


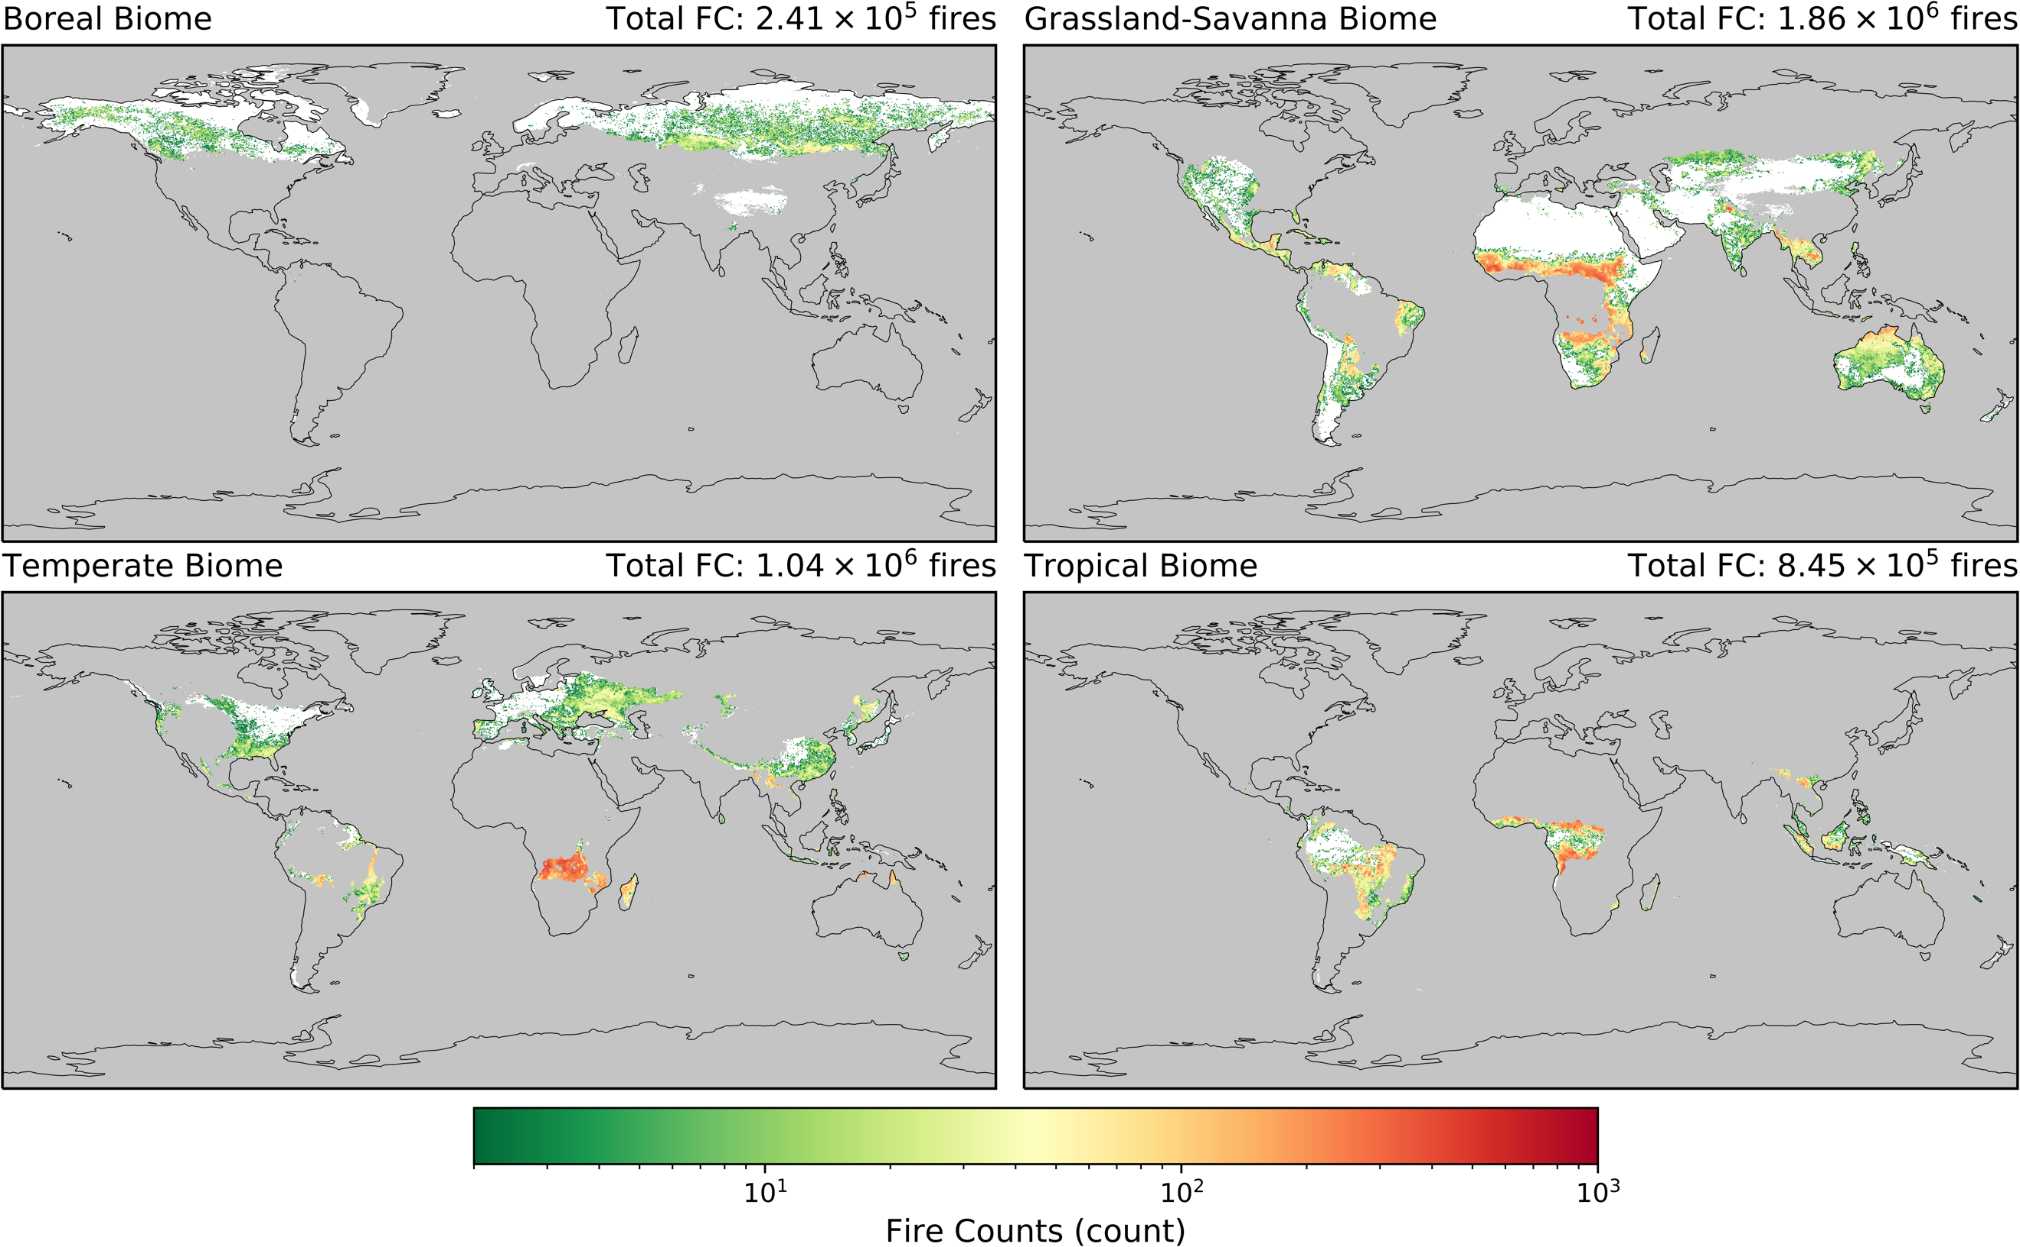


**Figure S5**. Annual mean fire counts partitioned in the biomes used in this study, noting the total mean annual fire counts are listed above each figure. Gray represents area outside of the biome, and white indicates that there are zero fire counts in that location.


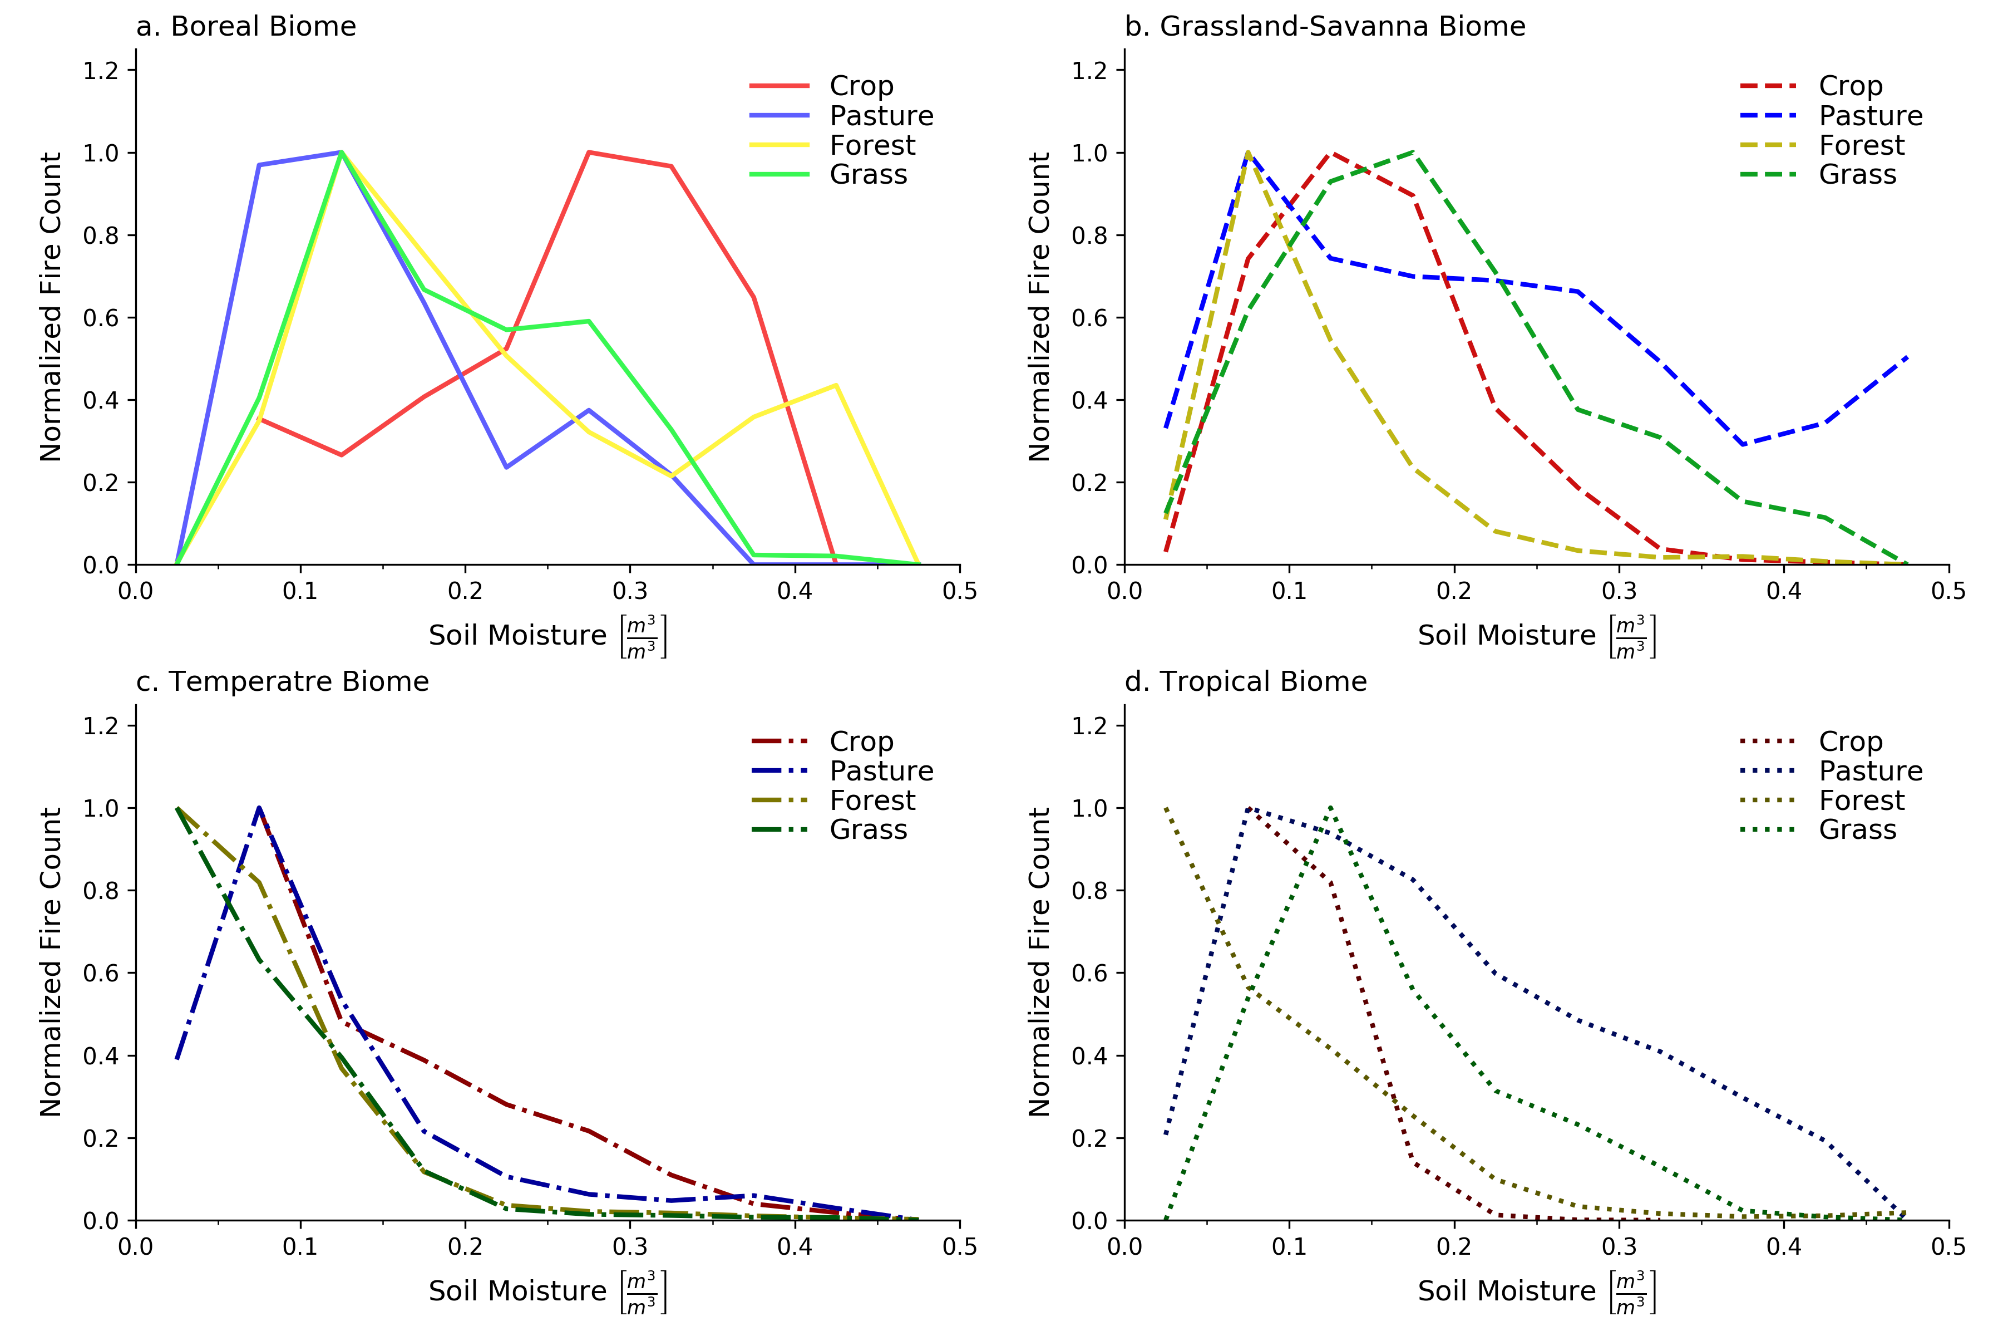


**Figure S6**: The relationships between fire counts and soil moisture across LULC types within each biome similar to Figure 4 in the main text but displayed per biome.


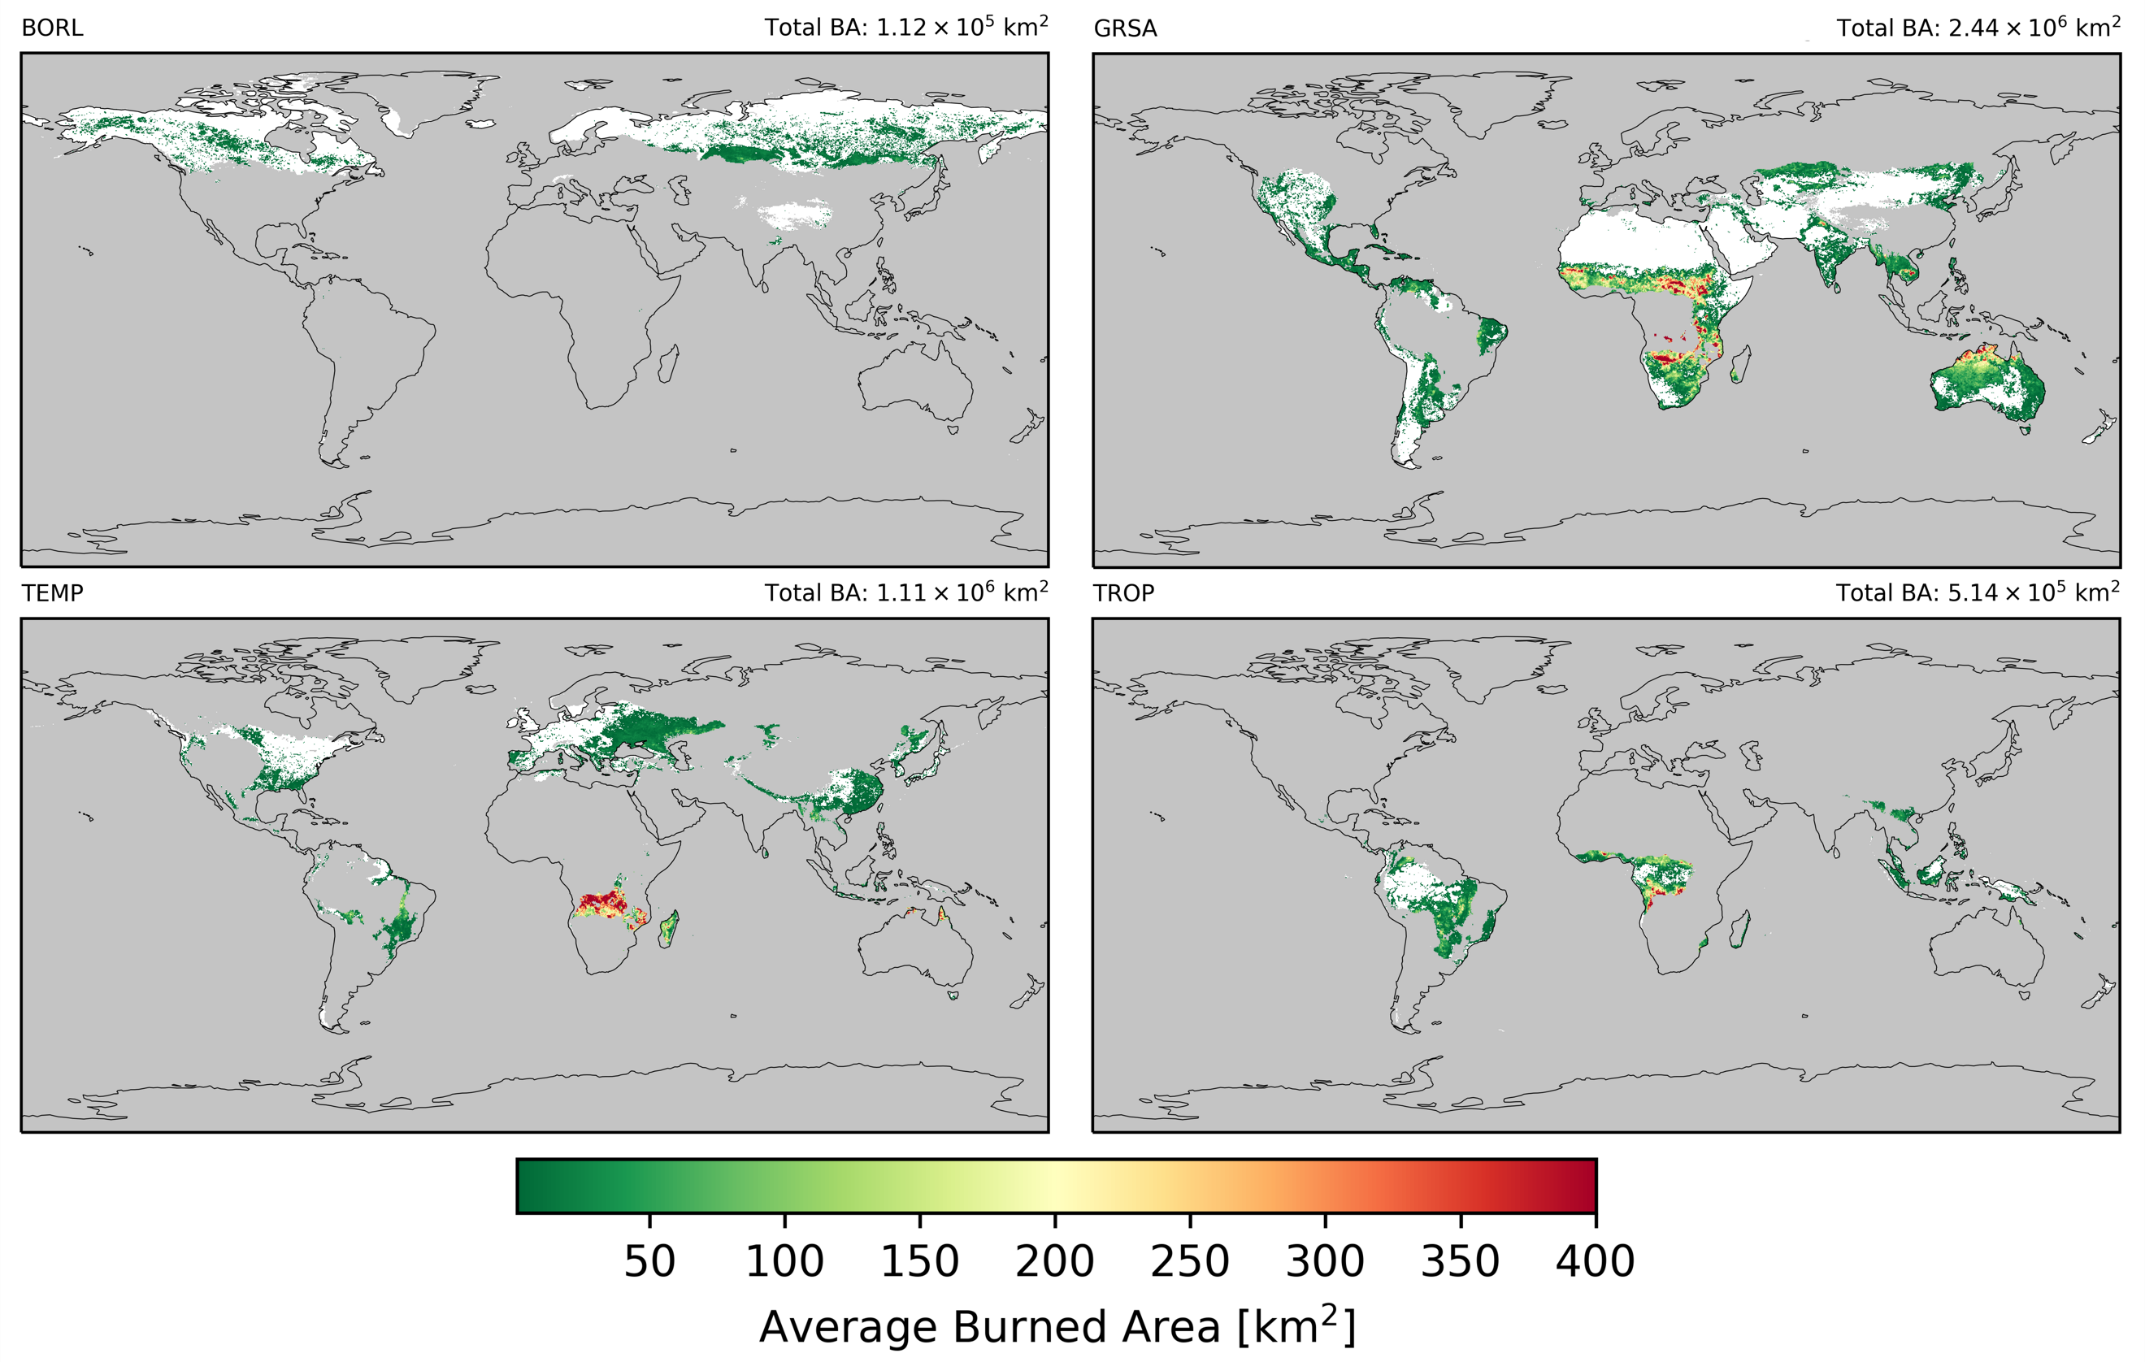


**Figure S7**: Annual mean burned area partitioned in the biomes used in this study, noting the total mean annual burned area are listed above each figure. Gray represents area outside of the biome, and white indicates that there is zero burned area in that location.


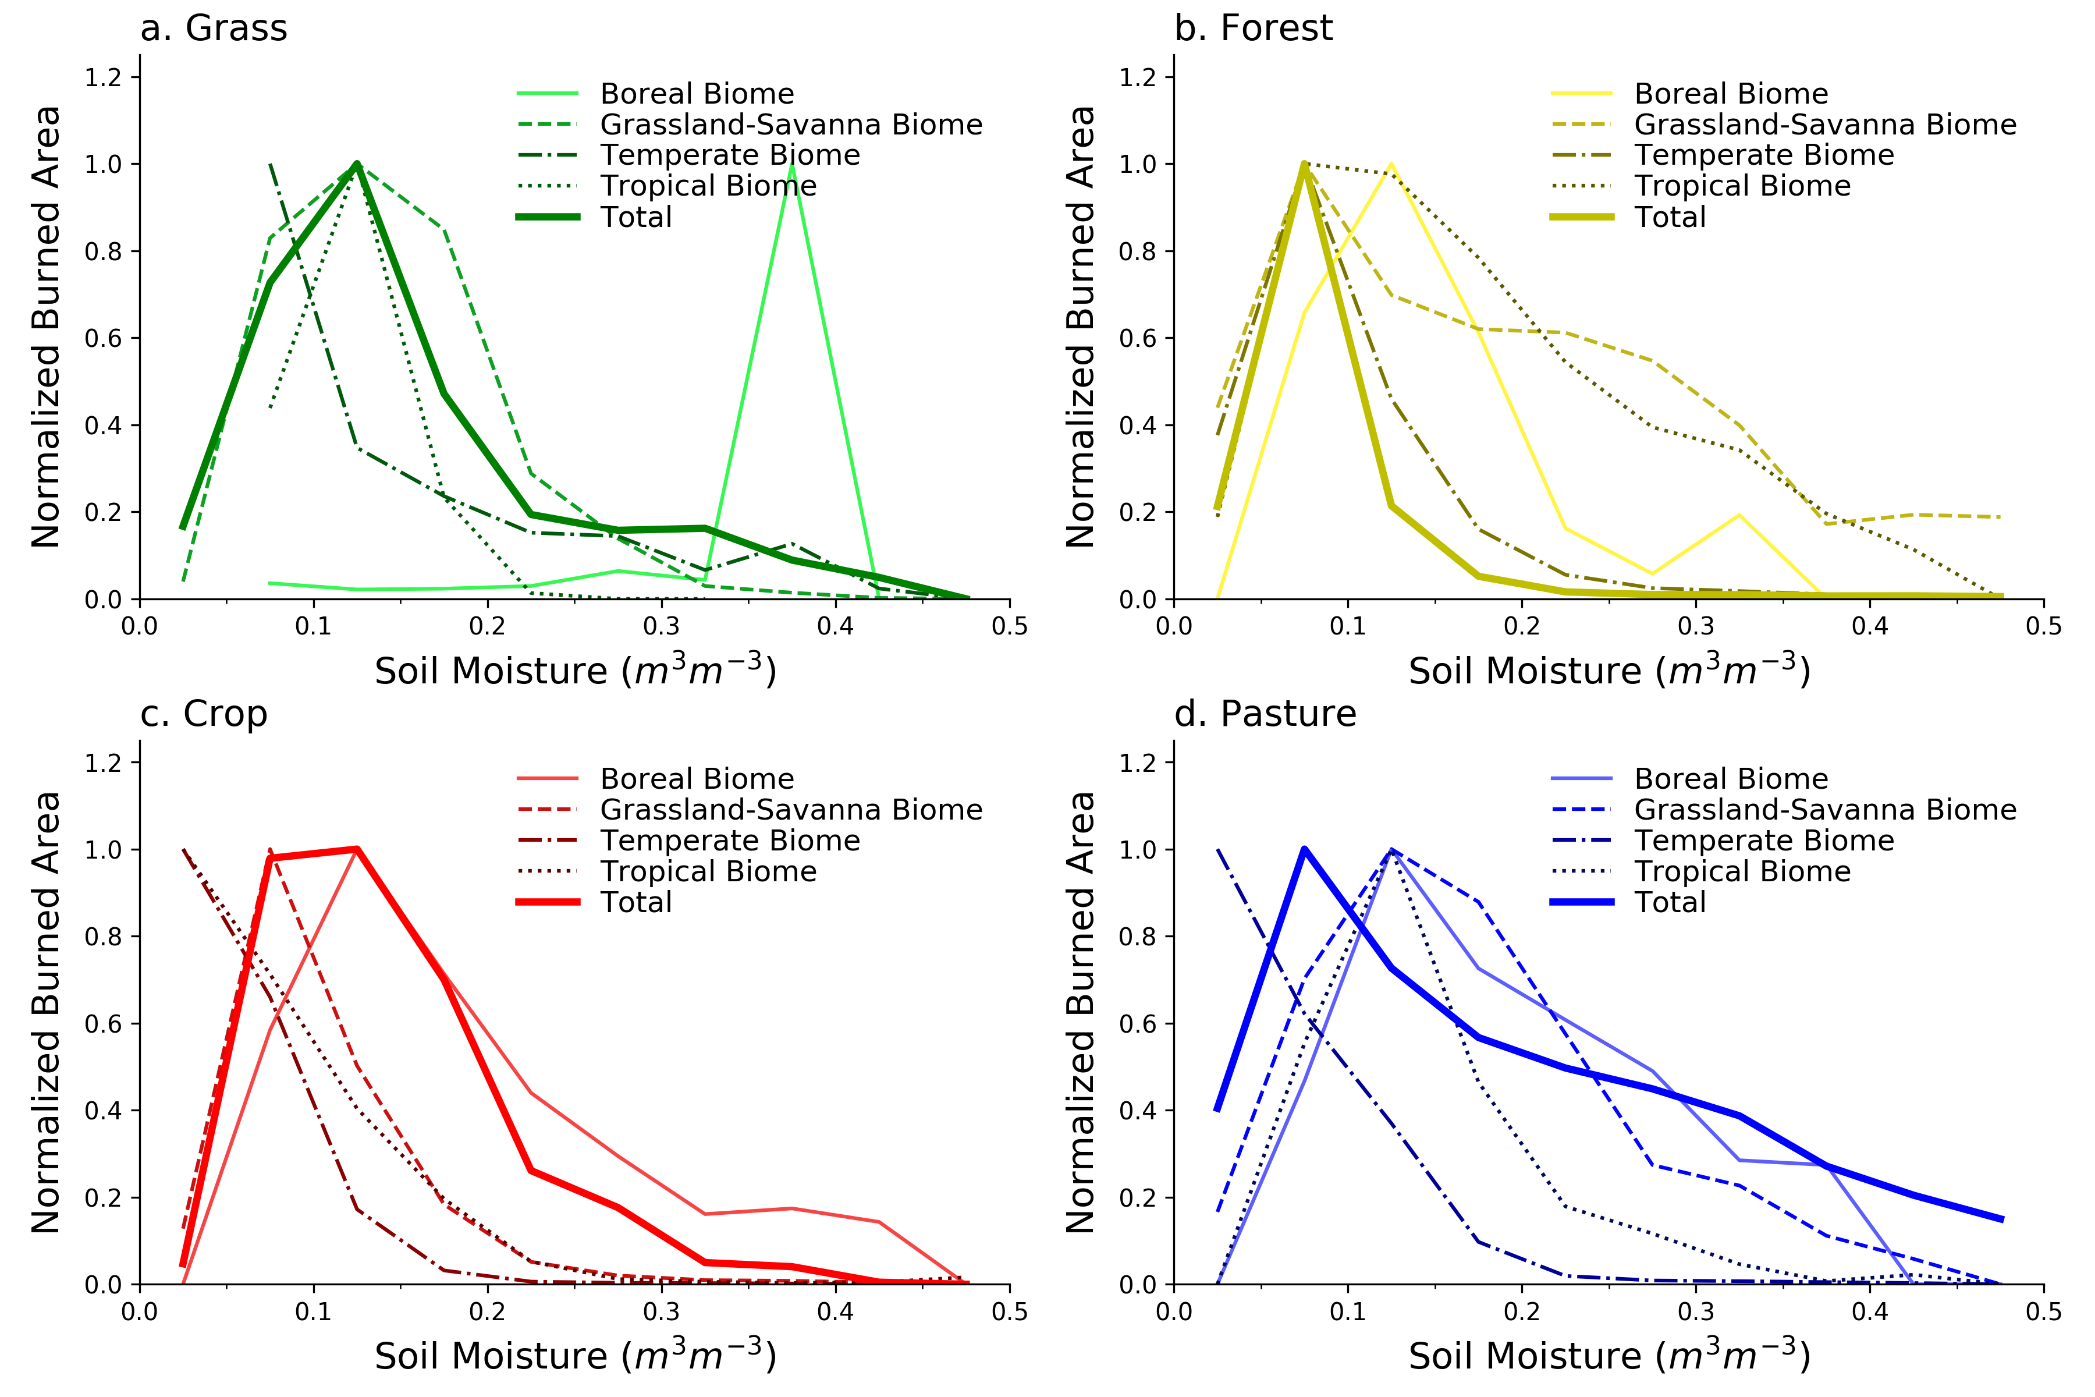


**Figure S8:** The relationships between burned area and soil moisture across biomes for specific LULC types. Total represents the burned area-SM curve for the global data (in Figure S3).


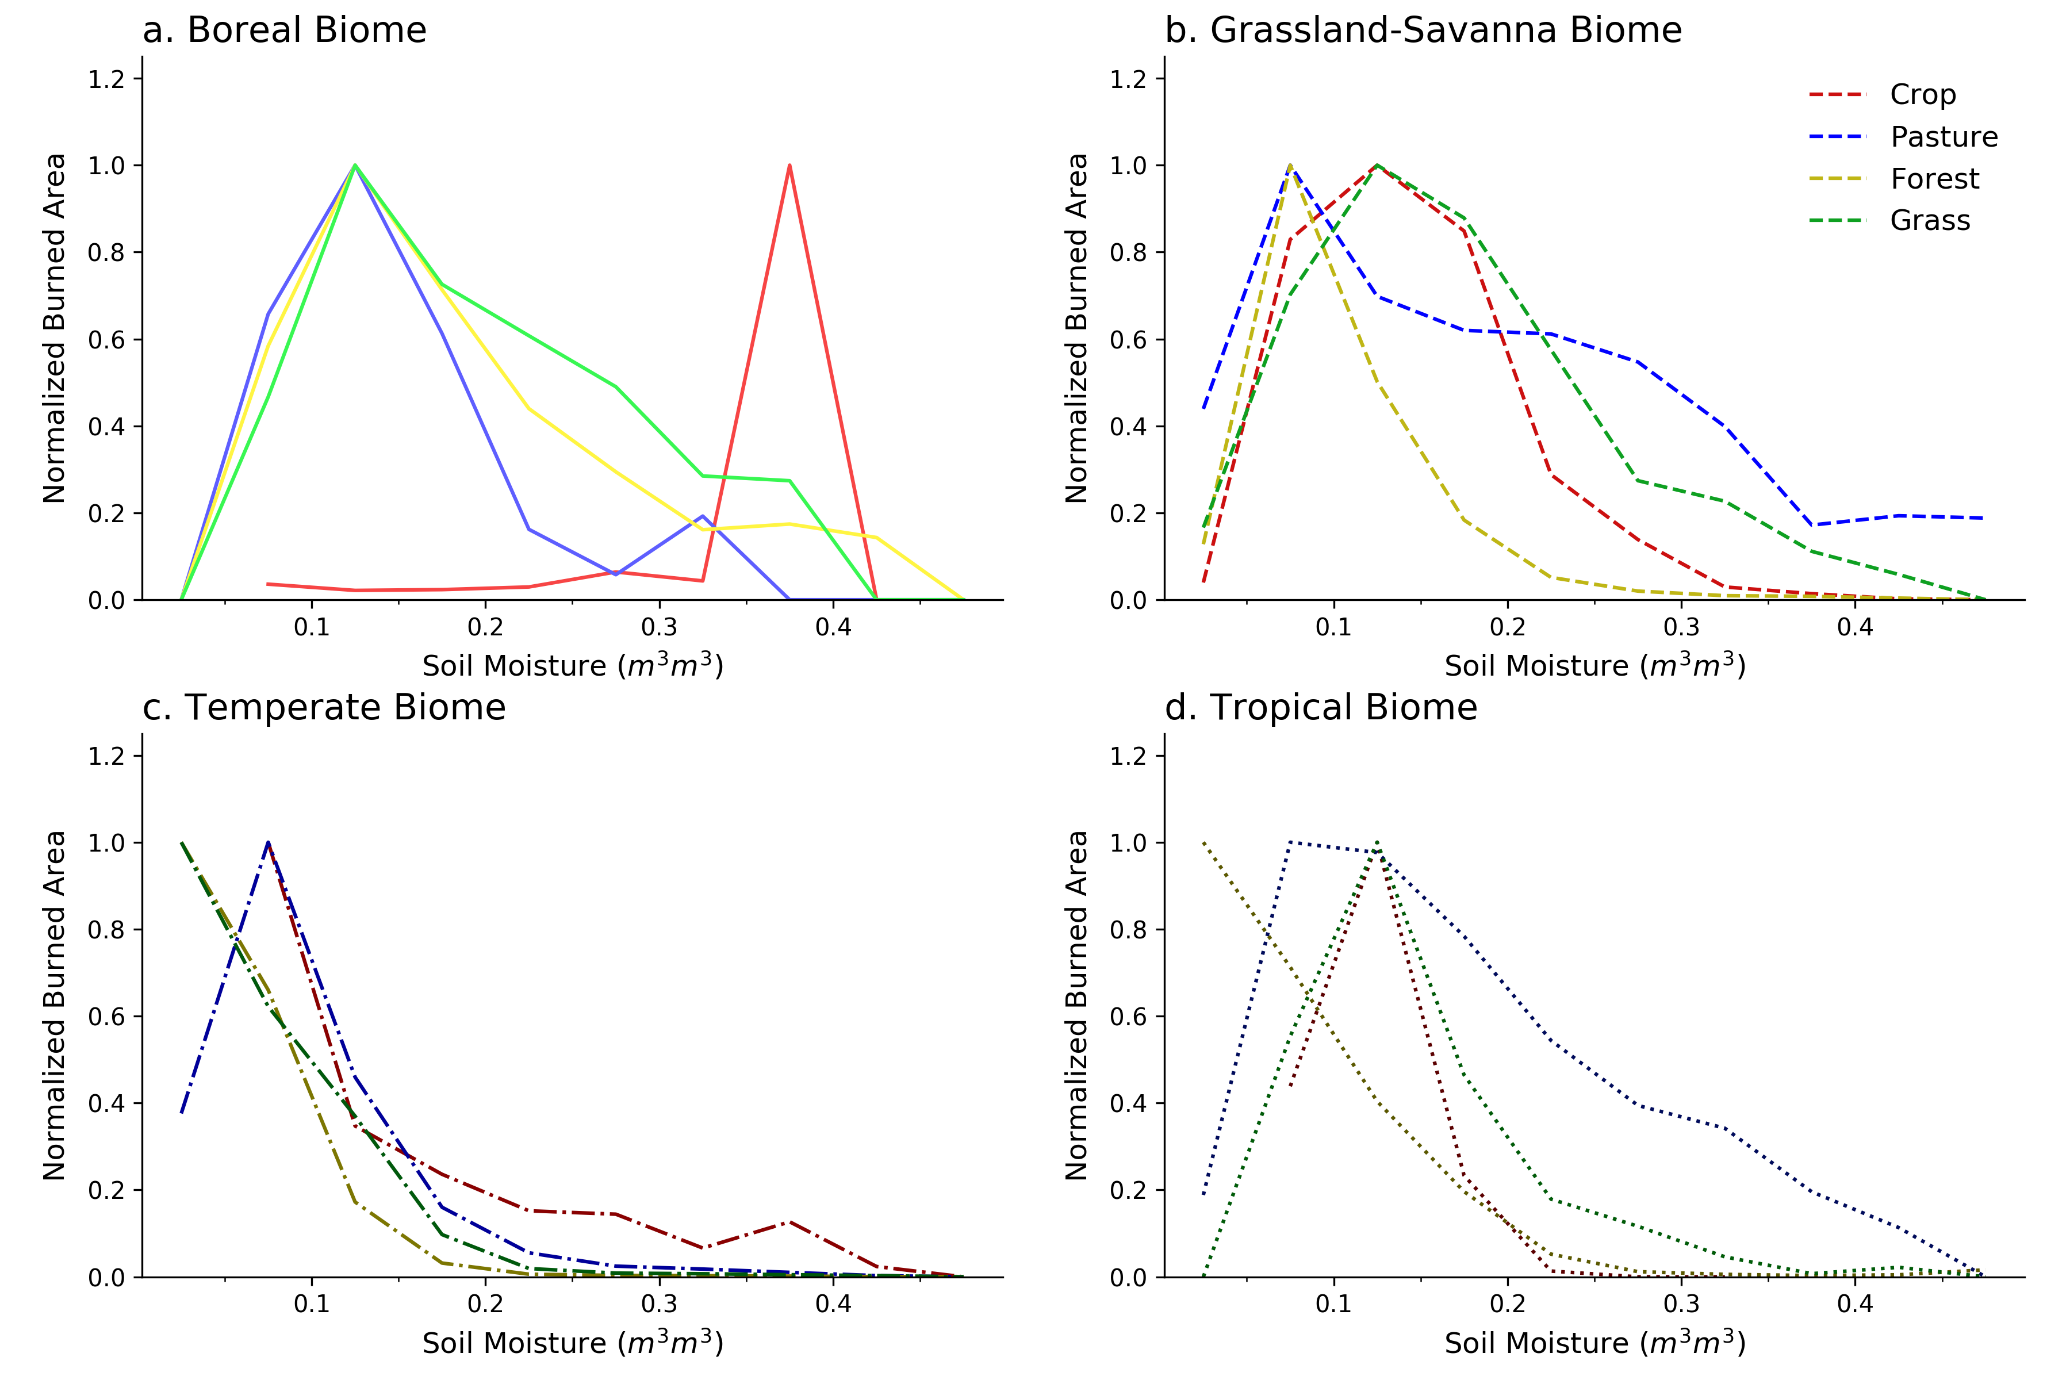


**Figure S9:** The relationships between burned area and soil moisture across LULC types within each biome similar to Figure S8 but displayed per biome.

References

1. van der Werf, G.R.; Randerson, J.T.; Giglio, L.; van Leeuwen, T.T.; Chen, Y.; Rogers, B.M.; Mu, M.; van Marle, M.J.E.; Morton, D.C.; Collatz, G.J.; et al. Global fire emissions estimates during 1997–2016. Earth Syst. Sci. Data 2017, 9, 697–720.
2. Giglio, L.; Loboda, T.; Roy, D.; Quayle, B.; Justice, C. An Active-fire Based Burned Area Mapping Algorithm for the MODIS Sensor. Remote Sens. Environ. 2009, 113, 408–420.
3. Giglio, L.; Randerson, J.T.; van derWerf, G.R. Analysis of Daily, Monthly and Annual Burned Area Using the Fourth-Generation Global Fire Emissions Database (GFED4). J. Geophys. Res. 2013, 118, 317–328.
4. Humber, M.L.; Boschetti, L.; Giglio, L.; Justice, C.O. Spatial and temporal intercomparison of four global burned area products. Int. J. Digit. Earth 2019, 12, 460–484.
5. Randerson, J.T.; Chen, Y.; van derWerf, G.R.; Roger, B.M.; Morton, D.C. Global Burned Area and Biomass Burning Emissions from Small Fire. J. Geophys. Res. 2012, 117, 1–23.

| 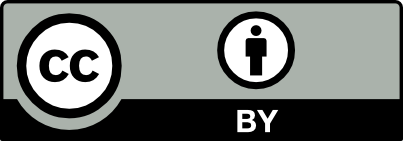 | © 2019 by the authors. Submitted for possible open access publication under the terms and conditions of the Creative Commons Attribution (CC BY) license (http://creativecommons.org/licenses/by/4.0/). |
| --- | --- |
